# Supplementary material
Source: MDPI journal article supplement (https://www.mdpi.com/2079-9284/4/4/44)
Supplement: s1 [file s1]

# Supplementary Materials: Non-Invasive Assessment of Skin Barrier Properties: Investigating Emerging Tools for In Vitro and In Vivo Applications

Emer Duffy, Keana De Guzman, Robert Wallace, Ronan Murphy and Aoife Morrin

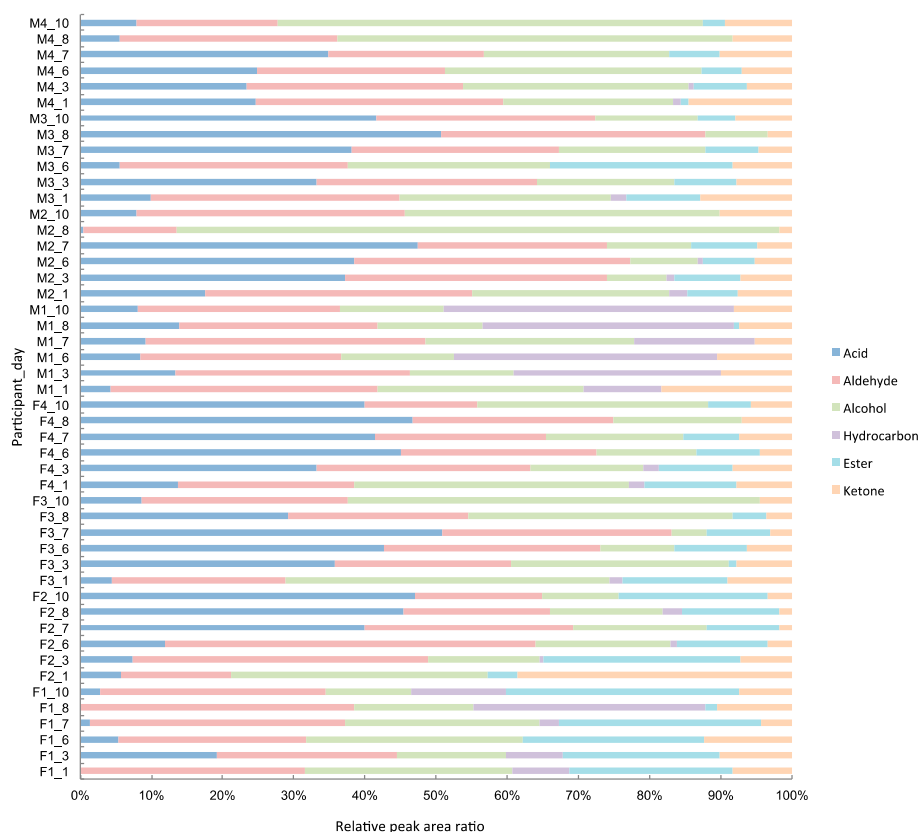

**Figure S1.** Distribution of compound classes in human skin volatile samples. Compounds were classified according to chemical functionality based on chromatographic peak areas as determined by HS-SPME GC-MS. (F = female, M = male)

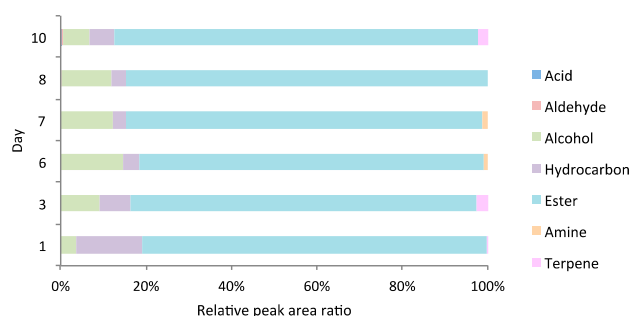

**Figure S2.** Distribution of compound classes in volatile samples from human skin equivalent. Compounds were classified according to chemical functionality based on chromatographic peak areas as determined by HS-SPME GC-MS.
